# Supplementary material for: Effect of Costimulatory Blockade With Abatacept After Ustekinumab Withdrawal in Patients With Moderate to Severe Plaque Psoriasis: The PAUSE Randomized Clinical Trial
Source: PubMed Central journal article supplement (PMC8515260; doi:10.1001/jamadermatol.2021.3492), 2021-10-13
Supplement: jamadermatol-e213492-s005.pdf [file jamadermatol-e213492-s005.pdf]

## Data Sharing Statement

Harris. Effect of Costimulatory Blockade With Abatacept After Ustekinumab Withdrawal in Patients With Moderate to Severe Plaque Psoriasis. *JAMA Dermatol*. Published October 13, 2021. doi:10.1001/jamadermatol.2021.3492

### Data

**Data available:** Yes

**Data types:** Deidentified participant data, Other (please specify)

**Additional Information:** Clinical Protocol

**How to access data:** Data sets and the clinical protocol will be accessible through TrialShare, a public website managed by the Immune Tolerance Network

<https://www.itntrialshare.org/PAUSE.url>

**When available:** With publication

### Supporting Documents

**Document types:** None

### Additional Information

**Who can access the data:** Anyone requesting the data

**Types of analyses:** For any purpose

**Mechanisms of data availability:** All published data sets will be publicly available through TrialShare to anyone for any purpose after registering for a free account.

**Any additional restrictions:** No restrictions
